# Supplementary material
Source: PubMed Central journal article supplement (PMC5645212)

Male Female

Fascicle

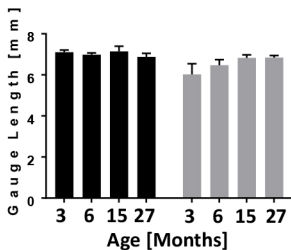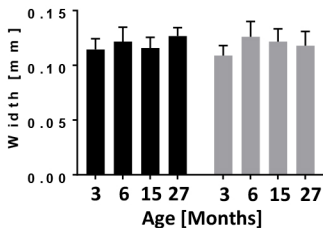

FDL

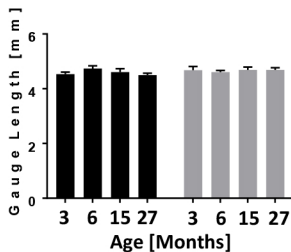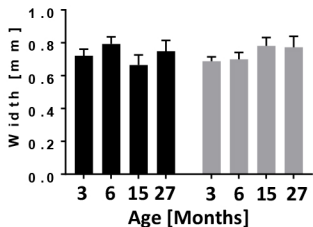

FCU

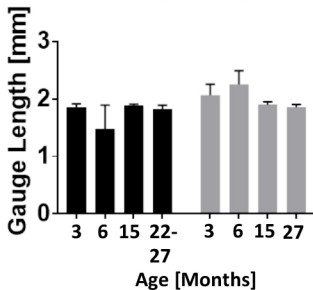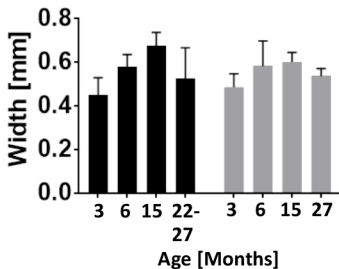

Supplement: NIHMS869707-supplement-Supplemental_Figure_1.pdf [file NIHMS869707-supplement-Supplemental_Figure_1.pdf]

BrdU Positive control

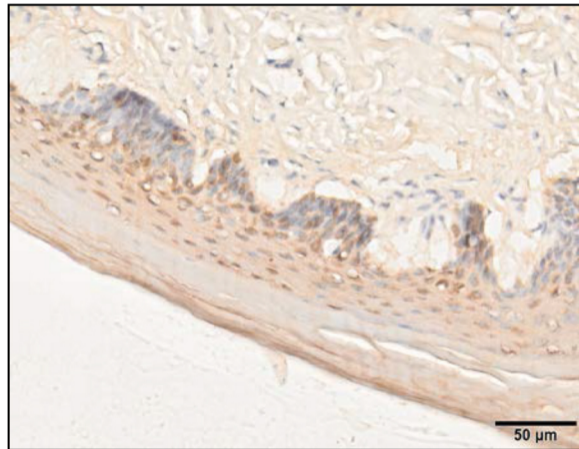

PCNA Positive control

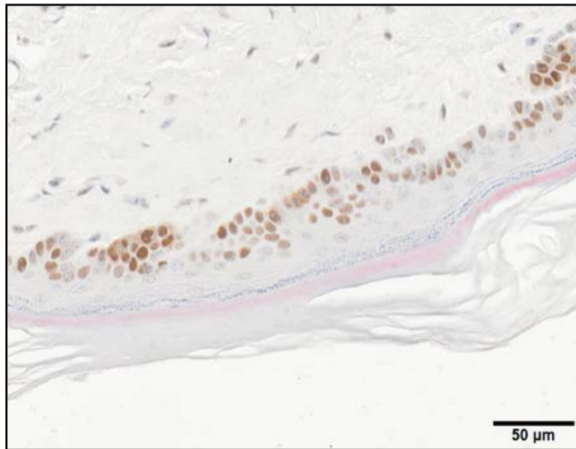

Ki67 Positive control

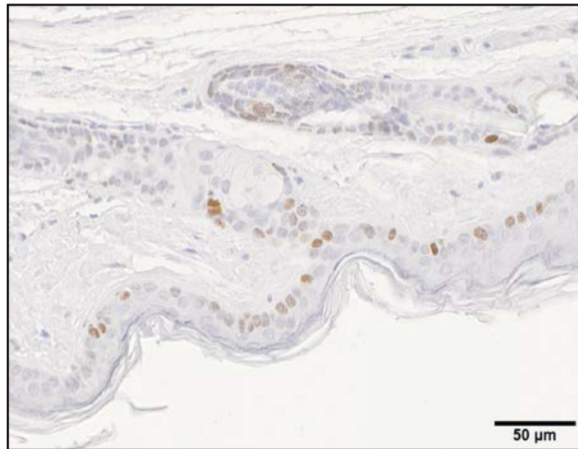

Supplement: NIHMS869707-supplement-Supplemental_Figure_2.pdf [file NIHMS869707-supplement-Supplemental_Figure_2.pdf]
